# Supplementary material
Source: PubMed Central journal article supplement (PMC2335186)
Supplement: cmaj_178_10_1293_v2_1.pdf [file cmaj_178_10_1293_v2_1.pdf]

**Appendix 1: Strategies used to search MEDLINE, EMBASE and the Cochrane Central Register of Controlled Trials to identify long-term ( $\geq 6$  months' duration) classic randomized controlled trials of selective serotonin reuptake inhibitors for adult patients with unipolar depression (part 1 of 2)**

| Search term                                                                                                                                                                                                                                                                                  | No. of records returned |
|----------------------------------------------------------------------------------------------------------------------------------------------------------------------------------------------------------------------------------------------------------------------------------------------|-------------------------|
| <b>MEDLINE (1950 to week 1, May 2007)</b>                                                                                                                                                                                                                                                    |                         |
| 1. ssri.mp. or exp serotonin uptake inhibitors/                                                                                                                                                                                                                                              | 22 054                  |
| 2. (fluoxetine or prozac).mp.                                                                                                                                                                                                                                                                | 7 288                   |
| 3. (sertraline or zoloft).mp.                                                                                                                                                                                                                                                                | 2 238                   |
| 4. (paroxetine or paxil).mp.                                                                                                                                                                                                                                                                 | 3 474                   |
| 5. (fluvoxamine or luvox).mp.                                                                                                                                                                                                                                                                | 1 919                   |
| 6. (citalopram or celexa).mp.                                                                                                                                                                                                                                                                | 2 606                   |
| 7. or/1-6                                                                                                                                                                                                                                                                                    | 24 094                  |
| 8. (clinical trial.pt. or randomized.ti,ab. or placebo.ti,ab. or dt.fs. or randomly.ti,ab. or trial.ti,ab. or groups.ti,ab.) not (animals/ not humans/)                                                                                                                                      | 1 867 991               |
| 9. 7 and 8                                                                                                                                                                                                                                                                                   | 13 027                  |
| 10. (letter not randomized controlled trial).pt.                                                                                                                                                                                                                                             | 586 428                 |
| 11. review.pt.                                                                                                                                                                                                                                                                               | 1 275 632               |
| 12. meta analysis.pt.                                                                                                                                                                                                                                                                        | 15 271                  |
| 13. editorial.pt.                                                                                                                                                                                                                                                                            | 202 717                 |
| 14. comment.pt.                                                                                                                                                                                                                                                                              | 329 262                 |
| 15. case reports.pt.                                                                                                                                                                                                                                                                         | 1 296 290               |
| 16. or/10-15                                                                                                                                                                                                                                                                                 | 3 204 707               |
| 17. 9 not 16                                                                                                                                                                                                                                                                                 | 7 270                   |
| 18. (2004\$ or 2005\$ or 2006\$ or 2007\$).ed.                                                                                                                                                                                                                                               | 2 299 763               |
| 19. (200306\$ or 200307\$ or 200308\$ or 200309\$ or 20031\$).ed.                                                                                                                                                                                                                            | 305 913                 |
| 20. 17 and (18 or 19)                                                                                                                                                                                                                                                                        | 2 110                   |
| <b>EMBASE (1980 to week 18, 2007)</b>                                                                                                                                                                                                                                                        |                         |
| 1. exp Serotonin Uptake Inhibitor/ or ssri.mp.                                                                                                                                                                                                                                               | 48 173                  |
| 2. (fluoxetine or prozac).mp.                                                                                                                                                                                                                                                                | 21 889                  |
| 3. (sertraline or zoloft).mp.                                                                                                                                                                                                                                                                | 10 301                  |
| 4. (paroxetine or paxil).mp.                                                                                                                                                                                                                                                                 | 12 685                  |
| 5. (fluvoxamine or luvox).mp.                                                                                                                                                                                                                                                                | 7 688                   |
| 6. (citalopram or celexa).mp.                                                                                                                                                                                                                                                                | 8 227                   |
| 7. or/1-6                                                                                                                                                                                                                                                                                    | 48 650                  |
| 8. limit 7 to "treatment (2 or more terms min difference)"                                                                                                                                                                                                                                   | 8 568                   |
| 9. limit 8 to yr="2003 - 2007"                                                                                                                                                                                                                                                               | 4 345                   |
| 10. limit 9 to (editorial or "review")                                                                                                                                                                                                                                                       | 1 852                   |
| 11. 9 not 10                                                                                                                                                                                                                                                                                 | 2 493                   |
| 12. limit 11 to human                                                                                                                                                                                                                                                                        | 2 438                   |
| 13. limit 11 to (amphibia or ape or bird or cat or cattle or chicken or dog or "ducks and geese" or fish or "frogs and toads" or goat or guinea pig or "hamsters and gerbils" or horse or monkey or mouse or "pigeons and doves" or "rabbits and hares" or rat or reptile or sheep or swine) | 39                      |
| 14. 11 not (13 not 12)                                                                                                                                                                                                                                                                       | 2 464                   |

*continued*

**Appendix 1: Strategies to search MEDLINE, EMBASE and the Cochrane Central Register of Controlled Trials to identify long-term ( $\geq 6$  months' duration) classic randomized controlled trials of selective serotonin reuptake inhibitors for adult patients with unipolar depression (part 2 of 2)**

| Search term                                                                 | No. of records returned |
|-----------------------------------------------------------------------------|-------------------------|
| <b>Cochrane Central Register of Controlled Trials (second quarter 2007)</b> |                         |
| 1. ssri.mp. or exp serotonin uptake inhibitors/                             | 3 430                   |
| 2. (fluoxetine or prozac).mp.                                               | 1 699                   |
| 3. (sertraline or zoloft).mp.                                               | 923                     |
| 4. (paroxetine or paxil).mp.                                                | 1 041                   |
| 5. (fluvoxamine or luvox).mp.                                               | 606                     |
| 6. (citalopram or celexa).mp.                                               | 505                     |
| 7. or/1-6                                                                   | 5 265                   |
| 8. limit 7 to yr="2003 - 2007"                                              | 1 125                   |
| 9. from 8 keep 1-1000                                                       | 1 000                   |
| 10. from 8 keep 1001-1125                                                   | 125                     |
| 11. limit 7 to yr="1898 - 2002"                                             | 4 140                   |
